# Supplementary material for: SUMOylation of PES1 upregulates its stability and function via inhibiting its ubiquitination
Source: PubMed Central journal article supplement (PMC5226600; doi:10.18632/oncotarget.10494), 2016-07-08
Supplement: oncotarget-07-50522-s001.pdf [file oncotarget-07-50522-s001.pdf]

## SUMOylation of PES1 upregulates its stability and function via inhibiting its ubiquitination

### SUPPLEMENTARY TABLE

Supplementary Table S1: Sequences for Si Trim23 and Si control

| Primer name              | Sequence              |
|--------------------------|-----------------------|
| Si Trim23-168 sense      | GCUAGAGUGUGGAGUUUGUTT |
| Si Trim23-168 antisense  | ACAAACUCCACACUCUAGCTT |
| Si Trim23-299 sense      | GCCCAUUUGAUCGACAAGUTT |
| Si Trim23-299 antisense  | ACUUGUCGAUCAAAUGGGCTT |
| Si Trim23-1377 sense     | GCCCAUCCAACA AUUGGUTT |
| Si Trim23-1377 antisense | ACCAAUUGUUGGAAUGGGCTT |
| Si control sense         | UUCUCCGAACGUGUCACGUTT |
| Si control antisense     | ACGUGACACGUUCGGAGAATT |
